# Supplementary material for: Examining Menstrual Tracking to Inform the Design of Personal Informatics Tools
Source: PubMed Central journal article supplement (PMC5432133; doi:10.1145/3025453.3025635), 2017-05-02

# Participant demographics

## Age

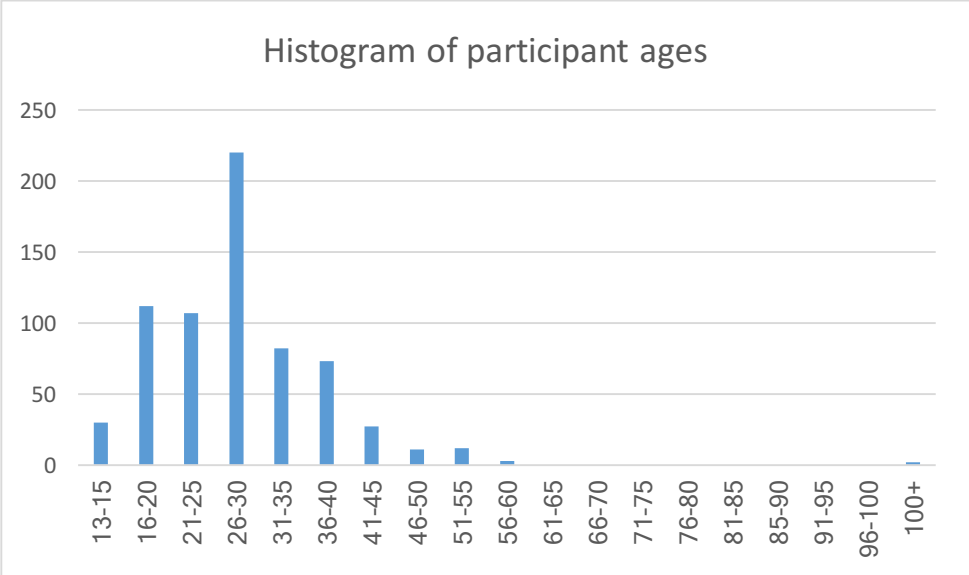

## Race

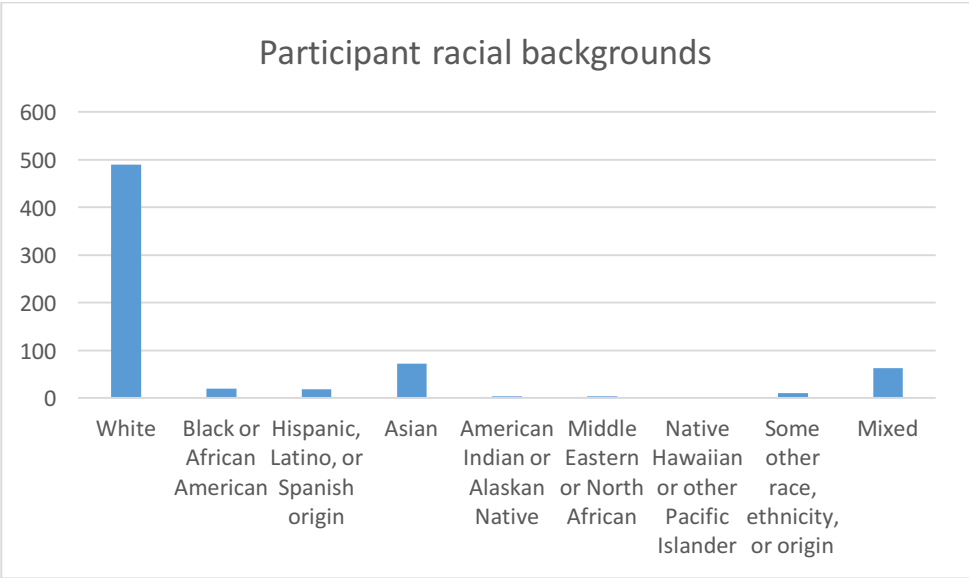

## Income

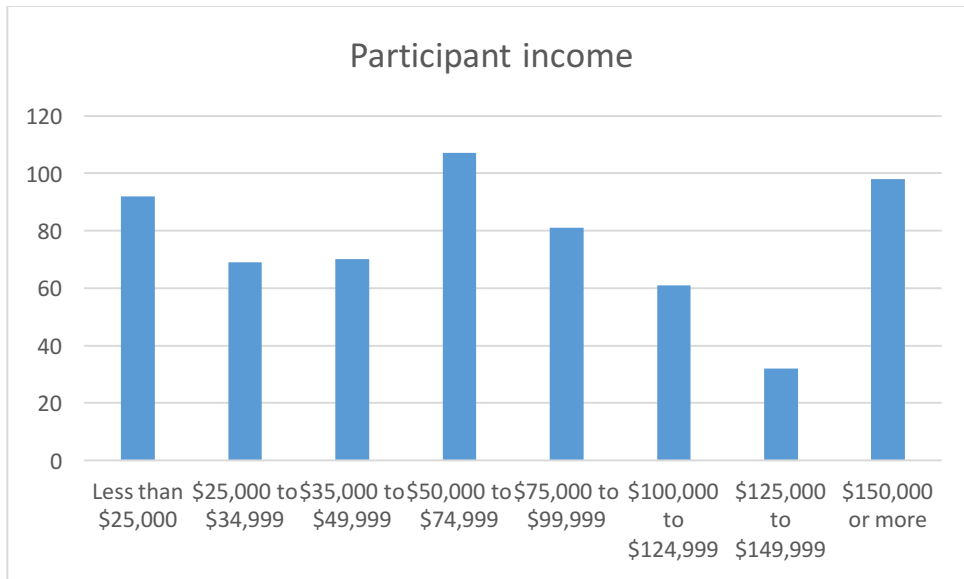

## Device ownership & access

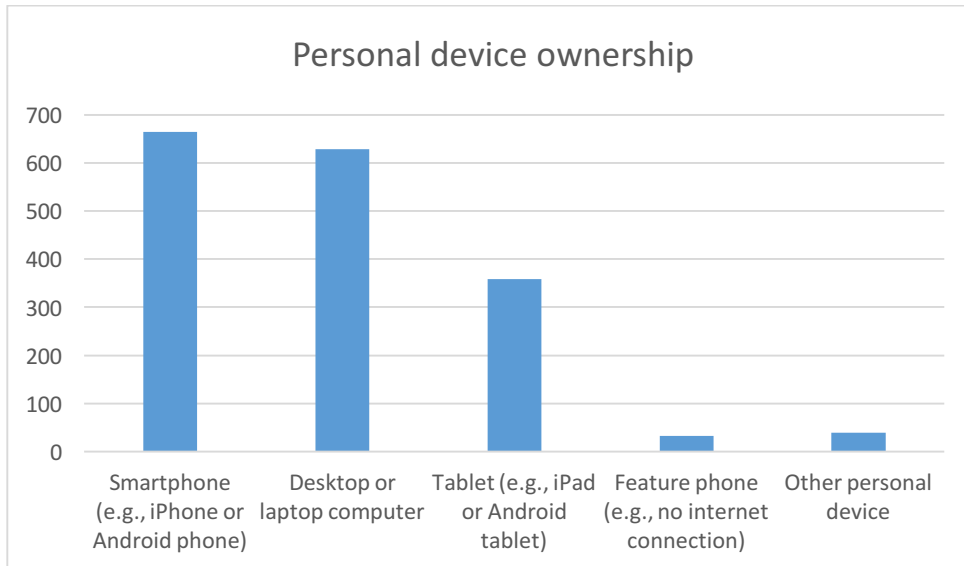

### Shared device access

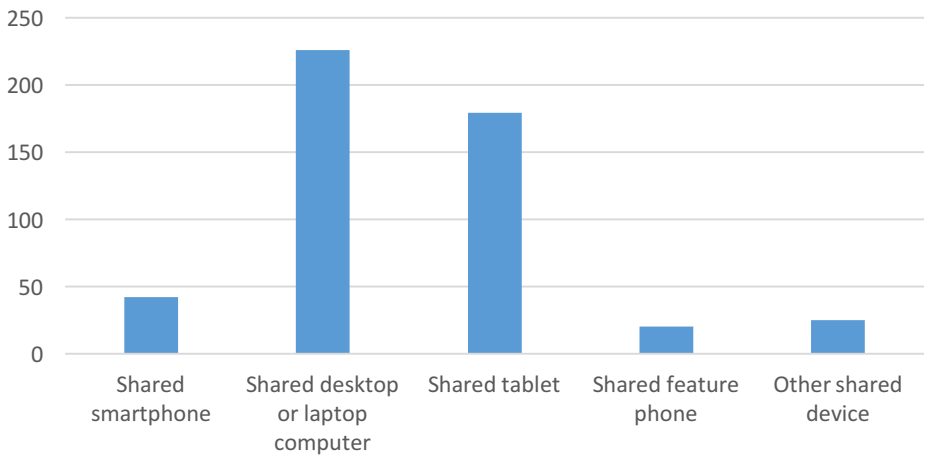

Supplement: NIHMS855306-supplement-1_-_Demographics.pdf [file NIHMS855306-supplement-1_-_Demographics.pdf]
